# Supplementary material
Source: PubMed Central journal article supplement (PMC2885197)
Supplement: supp_M110.115147_Suppdata.pdf [file supp_M110.115147_Suppdata.pdf]

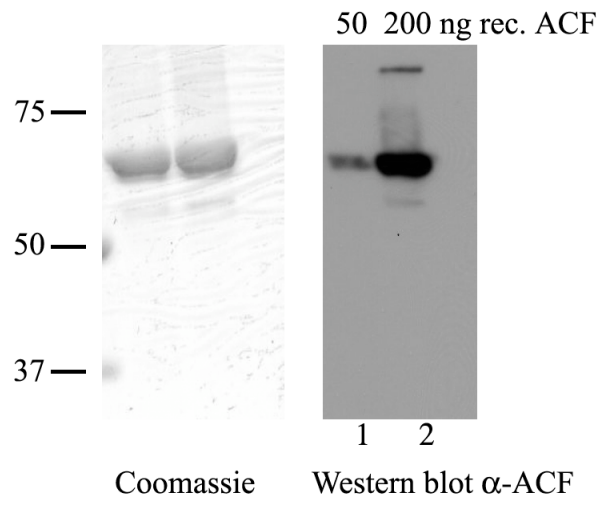

Supplemental Figure 1

**Supplemental figure 1.** Coomassie staining and Western blot of recombinant ACF. 100 ng of recombinant ACF was loaded in duplicate on a 10% SDS-PAGE and detected by Coomassie blue staining. In parallel 50 and 200 ng of recombinant ACF was resolved by SDS-PAGE and detected using anti-ACF IgG. Both detections reveal a major band of ~ 65 KDa. A faint band can be detected by Western blotting with higher amounts of recombinant protein (lane 2).
